# Supplementary material
Source: PubMed Central journal article supplement (PMC6697483)
Supplement: NIHMS1041923-supplement-1.pdf [file NIHMS1041923-supplement-1.pdf]

# Rosenfeld\_C: Heat Shock Protein genes

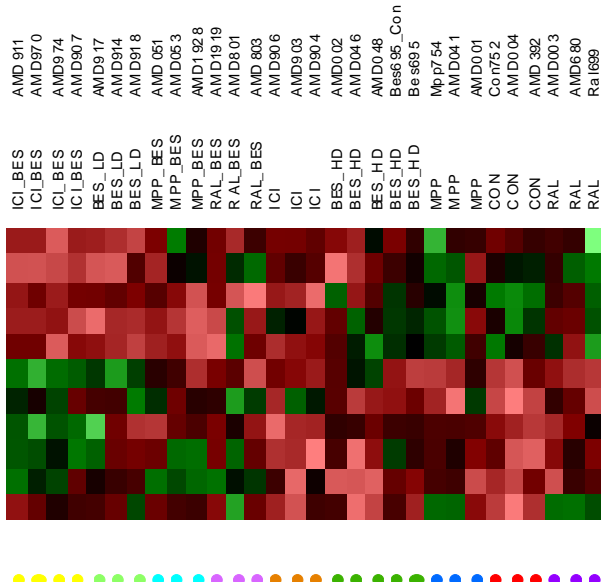

| 1 Probe Set ID | Representative Public ID | Gene Title                                               |
|----------------|--------------------------|----------------------------------------------------------|
| 1421290_at     | BG968304                 | heat shock protein family, member 7 (cardiovascular)     |
| 1425076_at     | A1606403                 | DnaJ (Hsp40) homolog, subfamily C, member 18             |
| 1442182_at     | AV256803                 | DnaJ (Hsp40) homolog, subfamily C, member 19             |
| 1417441_at     | NM_013888                | DnaJ (Hsp40) homolog, subfamily C, member 12             |
| 1449083_at     | AA067702                 | omega-iled-coil domain containing 91                     |
| 1431182_at     | AK004608                 | heat shock protein 8 // similar to heat shock protein 8, |
| 1449372_at     | BE624323                 | DnaJ (Hsp40) homolog, subfamily C, member 3A             |
| 1424622_at     | BC013716                 | heat shock factor 1                                      |
| 1448657_a_at   | NM_020266                | DnaJ (Hsp40) homolog, subfamily B, member 10             |
| 1434588_x_at   | A1181686                 | tubulin cofactor a // predicted gene, EG620313           |
| 1450436_s_at   | A1664344                 | DnaJ (Hsp40) homolog, subfamily B, member 5              |

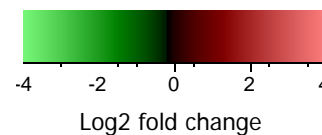

- DMSO Control
- beta-Estradiol (low dose)
- beta-Estradiol (high dose)
- ICI
- MPP
- Raloxifene
- ICI + beta-Estradiol
- MPP + beta-Estradiol
- Raloxifene + beta-Estradiol







## Rosenfeld\_C: Stress Response genes

AMD911  
 AMD970  
 AMD974  
 AMD907  
 AMD917  
 AMD914  
 AMD918  
 AMD051  
 AMD053  
 AMD1928  
 AMD1919  
 AMD801  
 AMD803  
 AMD906  
 AMD903  
 AMD904  
 AMD002  
 AMD046  
 AMD048  
 Bes695\_Con  
 Bes695  
 Mpp754  
 MPP  
 AMD041  
 AMD001  
 Con752  
 AMD004  
 AMD392  
 AMD003  
 AMD660  
 Rai699

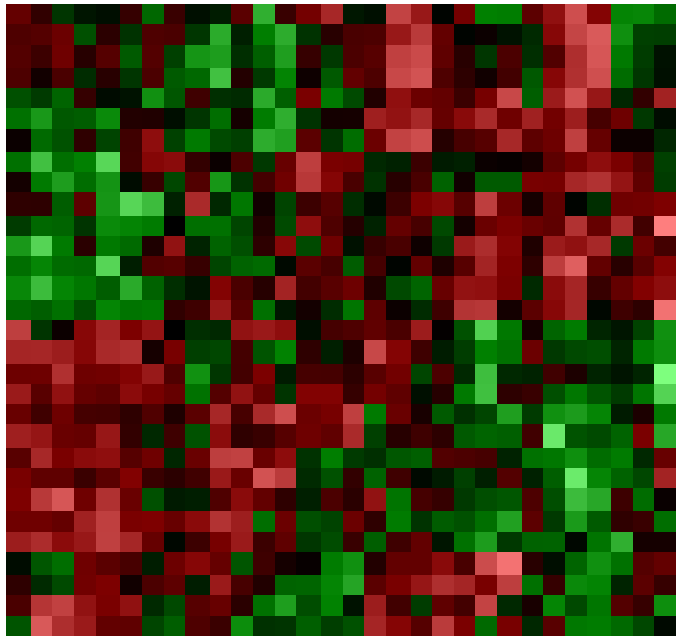

| 1 Probe Set ID | Representative Public ID | Gene Title                                                                                          |
|----------------|--------------------------|-----------------------------------------------------------------------------------------------------|
| 14 50436_s_at  | AI66434 4                | DnaJ (Hsp40) homolog, subfamily B, member 5                                                         |
| 14 18626_a_at  | NM_013492                | clusterin // similar to clusterin                                                                   |
| 14 37689_x_at  | AV152288                 | clusterin // similar to clusterin                                                                   |
| 14 54849_x_at  | BB433678                 | clusterin // similar to clusterin                                                                   |
| 14 49372_at    | BE624323                 | DnaJ (Hsp40) homolog, subfamily C, member 3A                                                        |
| 14 18670_s_at  | NM_008305                | perlecan (heparan sulfate proteoglycan 2)                                                           |
| 14 56733_x_at  | BB329489                 | serine (or cysteine) peptidase inhibitor, clade H, member 1                                         |
| 14 24622_at    | BC013716                 | heat shock factor 1                                                                                 |
| 14 17542_at    | BB737182                 | ribosomal protein S6 kinase, polypeptide 2                                                          |
| 14 53288_at    | AK020270                 | activating transcription factor 6                                                                   |
| 14 21960_at    | AF458089                 | adenylate cyclase 3                                                                                 |
| 14 28979_at    | AV316320                 | metal response element binding transcription factor 1                                               |
| 14 43609_s_at  | C85322                   | synovial apoptosis inhibitor 1, synoviolin                                                          |
| 14 31182_at    | AK004608                 | heat shock protein 8 // similar to heat shock protein 8 // similar to heat shock protein 70 cognate |
| 14 26798_a_at  | BC006897                 | protein phosphatase 1, regulatory (inhibitor) subunit 15b                                           |
| 14 22727_at    | NM_080637                | expressed in non-metastatic cells 5                                                                 |
| 14 25076_at    | AI606403                 | DnaJ (Hsp40) homolog, subfamily C, member 18                                                        |
| 14 21290_at    | BG968304                 | heat shock protein family, member 7 (cardiovascular)                                                |
| 14 49319_at    | NM_138683                | R-spondin homolog (Xenopus laevis)                                                                  |
| 14 42182_at    | AV256803                 | DnaJ (Hsp40) homolog, subfamily C, member 19                                                        |
| 14 27467_a_at  | AJ238396                 | retinitis pigmentosa GTPase regulator                                                               |
| 14 15759_a_at  | BC028547                 | hepatitis B virus x-interacting protein                                                             |
| 14 48427_at    | NM_025987                | NADH dehydrogenase (ubiquinone) 1 alpha subcomplex, 6(B14)                                          |
| 14 60725_at    | NM_011728                | xeroderma pigmentosum, complementation group A                                                      |
| 14 17441_at    | NM_013888                | DnaJ (Hsp40) homolog, subfamily C, member 12                                                        |
| 14 48923_at    | NM_011871                | protein kinase, interferon inducible double stranded RNA dependent activator                        |
| 14 60671_at    | BI219063                 | glutathione peroxidase 1                                                                            |
| 14 23627_at    | AV158882                 | NAD(P)H dehydrogenase, quinone 1                                                                    |
| 14 16138_at    | BC008997                 | annexin A7                                                                                          |
| 14 22005_at    | BE911144                 | eukaryotic translation initiation factor 2-alpha kinase 2                                           |

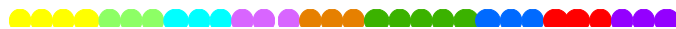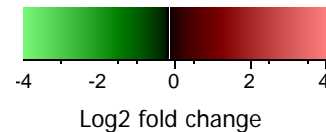

- DMSO Control
- beta-Estradiol (low dose)
- beta-Estradiol (high dose)
- ICI
- MPP
- Raloxifene
- ICI + beta-Estradiol
- MPP + beta-Estradiol
- Raloxifene + beta-Estradiol



# Rosenfeld\_C: Signal Transduction genes (top half)

Supplementary Material, Figure 1g

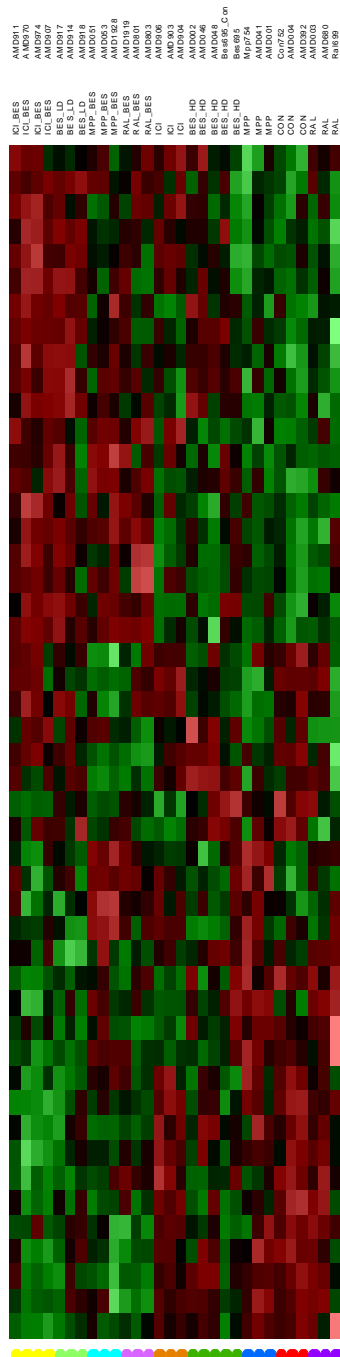

| 1 Probe Set ID | Representative Public ID | Gene Title                                                                             |
|----------------|--------------------------|----------------------------------------------------------------------------------------|
| 1431074_a_at   | BI654600                 | phosphatidylinositol transfer protein, cytoplasmic 1                                   |
| 1448948_at     | NM_009057                | recombination activating gene 1 activating protein 1                                   |
| 1426478_at     | AA124924                 | RAS p21 protein activator 1                                                            |
| 1420554_a_at   | NM_133223                | RAS-related C3 botulinum substrate 3                                                   |
| 1425679_a_at   | AF109769                 | mitogen activated protein kinase 8 interacting protein 1                               |
| 1449951_at     | NM_010909                | nuclear factor of kappa light polypeptide gene enhancer in B-cells inhibitor-like 1    |
| 1448922_at     | NM_024438                | dual specificity phosphatase 19                                                        |
| 1418712_at     | NM_021454                | CDC42 effector protein (Rho GTPase binding) 5                                          |
| 1422178_a_at   | NM_008998                | RAB17, member RAS oncogene family                                                      |
| 1430234_at     | AK018621                 | ADP-ribosylation factor-like 14                                                        |
| 1417790_at     | BC013066                 | docking protein 1                                                                      |
| 1455337_at     | BQ175875                 | FYVE, RhoGEF and PH domain containing 4                                                |
| 1437225_x_at   | BB782705                 | guanine nucleotide binding protein (G protein), alpha inhibiting 3                     |
| 1436900_x_at   | AV156961                 | leptin receptor overlapping transcript                                                 |
| 1445693_at     | BB319063                 | v-ras murine sarcoma 3611 viral oncogene homolog                                       |
| 1417478_a_at   | AV367559                 | protein phosphatase 2, regulatory subunit B', gamma                                    |
| 1423459_at     | BE853265                 | COP9 (constitutive photomorphogenic) homolog, subunit 2 (Arabidopsis thaliana)         |
| 1437039_at     | BM119274                 | COP9 (constitutive photomorphogenic) homolog, subunit 2 (Arabidopsis thaliana)         |
| 1425542_a_at   | BC003979                 | protein phosphatase 2, regulatory subunit B (B56), gamma isoform                       |
| 1436566_at     | AV364488                 | Rab40b, member RAS oncogene family                                                     |
| 1450158_at     | BB624483                 | rad and gem related GTP binding protein 1                                              |
| 1421854_at     | BF136544                 | fibrinogen-like protein 2                                                              |
| 1450772_at     | NM_009519                | wingless-related MMTV integration site 11                                              |
| 1429206_at     | AK014194                 | Rho-related BTB domain containing 1                                                    |
| 1433600_at     | BB262415                 | adrenergic receptor, alpha 2a /// similar to adrenergic receptor, alpha 2a             |
| 1448606_at     | U70622                   | endothelial differentiation, lysophosphatidic acid G-protein-coupled receptor, 2       |
| 1434850_at     | BI083036                 | IQ motif containing GTPase activating protein 3                                        |
| 1422620_s_at   | NM_008903                | phosphatidic acid phosphatase 2a                                                       |
| 1439015_at     | AV221299                 | glial cell line derived neurotrophic factor family receptor alpha 1                    |
| 1434295_at     | BE691356                 | RAS guanyl releasing protein 1                                                         |
| 1447669_s_at   | AV347903                 | guanine nucleotide binding protein (G protein), gamma 4 subunit                        |
| 1436359_at     | BF471533                 | ret proto-oncogene                                                                     |
| 1453288_at     | AK020270                 | activating transcription factor 6                                                      |
| 1425795_a_at   | D76446                   | mitogen activated protein kinase kinase kinase 7                                       |
| 1420905_at     | AK010040                 | interleukin 17 receptor A                                                              |
| 1451912_a_at   | AF321301                 | fibroblast growth factor receptor-like 1 /// similar to fibroblast growth factor recep |
| 1428265_at     | AK010754                 | protein phosphatase 2 (formerly 2A), regulatory subunit A (PR 65), beta isoform        |
| 1433803_at     | BQ032637                 | Janus kinase 1                                                                         |
| 1426915_at     | BC021490                 | death associated protein kinase 1                                                      |
| 1434254_at     | BM235739                 | guanine nucleotide binding protein, alpha 11                                           |
| 1424193_at     | AB041855                 | PWP2 periodic tryptophan protein homolog (yeast)                                       |
| 1434836_at     | AV277440                 | nuclear factor of activated T-cells, cytoplasmic, calcineurin-dependent 2 interact     |
| 1416342_at     | NM_011607                | tenascin C                                                                             |
| 1428016_a_at   | BC028444                 | Ras interacting protein 1                                                              |
| 1455008_at     | BF467143                 | similar to Guanine nucleotide-binding protein alpha-12 subunit (G alpha-12)            |
| 1435272_at     | BE196957                 | inositol 1,4,5-trisphosphate 3-kinase B                                                |
| 1450650_at     | AV297945                 | myosin X                                                                               |
| 1436173_at     | BB768194                 | deleted in liver cancer 1                                                              |

# Rosenfeld\_C: Signal Transduction genes (bottom half)

Supplementary Material, Figure 1h

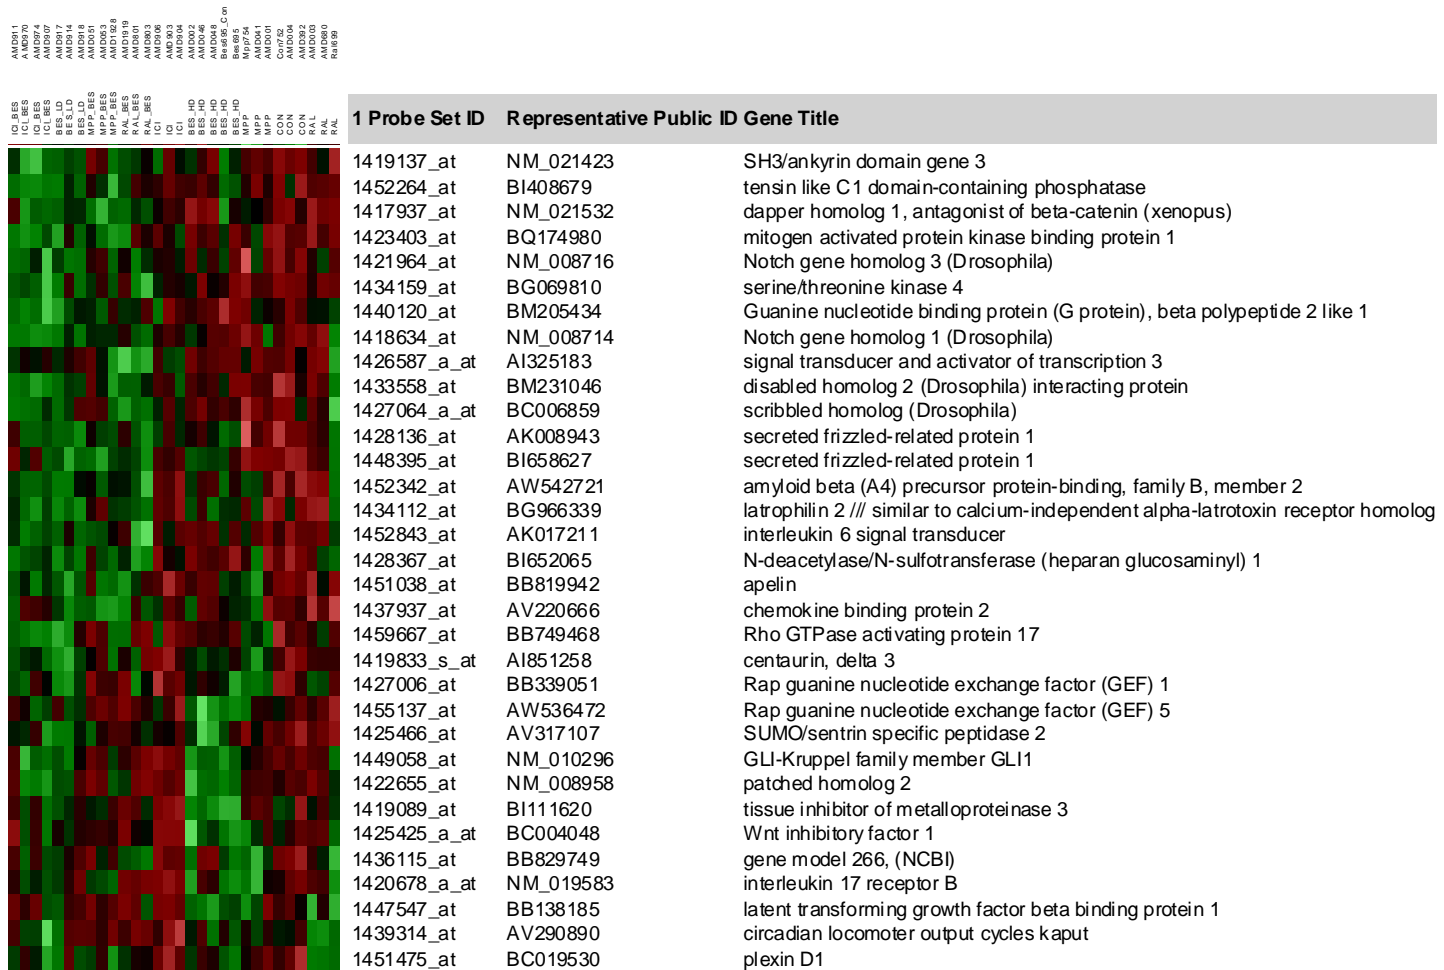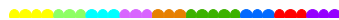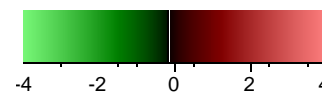

Log2 fold change

- DMSO Control
- beta-Estradiol (low dose)
- beta-Estradiol (high dose)
- ICI
- MPP
- Raloxifene
- ICI + beta-Estradiol
- MPP + beta-Estradiol
- Raloxifene + beta-Estradiol



## Rosenfeld\_C: Wnt/Hedgehog signaling pathway genes

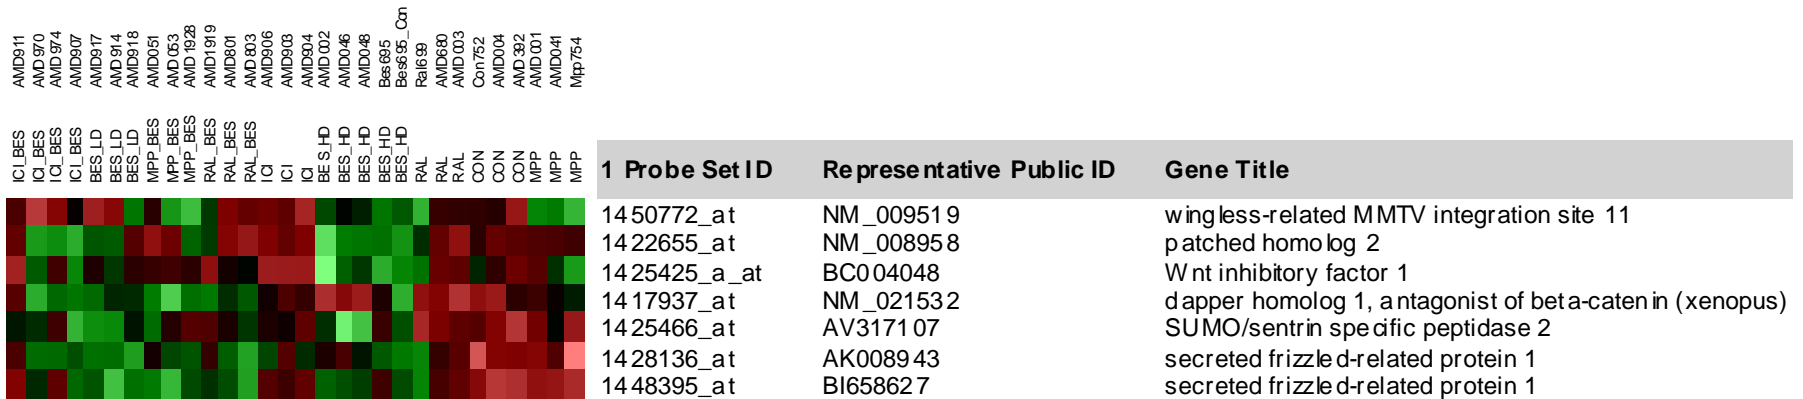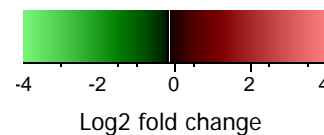

- DMSO Control
- beta-Estradiol (low dose)
- beta-Estradiol (high dose)
- ICI
- MPP
- Raloxifene
- ICI + beta-Estradiol
- MPP + beta-Estradiol
- Raloxifene + beta-Estradiol

## Rosenfeld\_C: Glycolysis/Gluconeogenesis/Carbohydrate metabolism genes

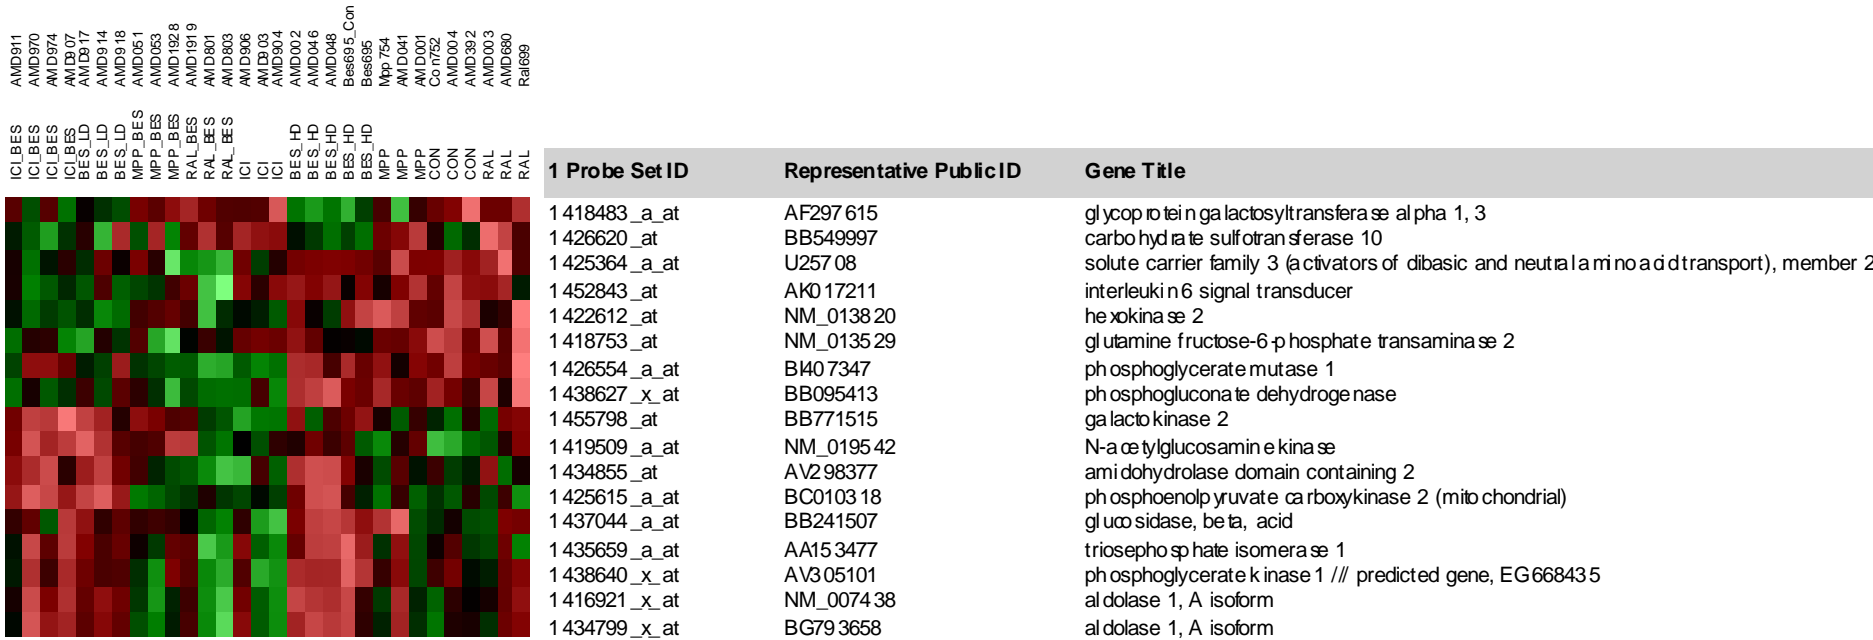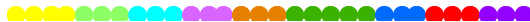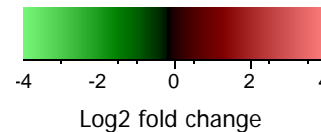

- DMSO Control
- beta-Estradiol (low dose)
- beta-Estradiol (high dose)
- ICI
- MPP
- Raloxifene
- ICI + beta-Estradiol
- MPP + beta-Estradiol
- Raloxifene + beta-Estradiol

## Rosenfeld\_C: Cell cycle associated genes

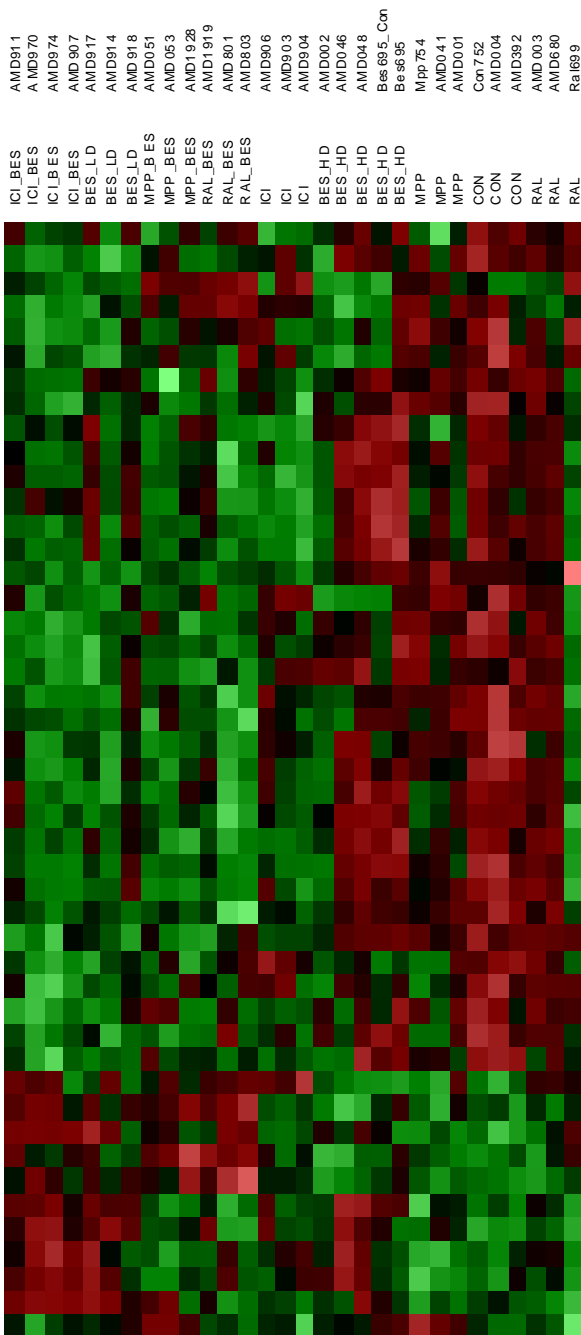

| 1 Probe Set ID | Representative Public ID | Gene Title                                                                     |
|----------------|--------------------------|--------------------------------------------------------------------------------|
| 1417139_at     | NM_025853                | DSN1, MIND kinetochore complex component, homolog (S. cerevisiae)              |
| 1434426_at     | BG069311                 | non-SMC condensin II complex, subunit D3                                       |
| 1433773_at     | AA543385                 | ribonucleotide reductase M2 B (TP53 inducible)                                 |
| 1428831_at     | AV333805                 | SUMO/sentrin specific peptidase 5                                              |
| 1448542_at     | NM_025392                | BRCA2 and CDKN1A interacting protein                                           |
| 1434564_at     | BQ176318                 | E2F transcription factor 3                                                     |
| 1452459_at     | BB648052                 | asp (abnormal spindle)-like, microcephaly associated (Drosophila)              |
| 1436186_at     | BM247465                 | E2F transcription factor 8                                                     |
| 1434748_at     | BM208103                 | cytoskeleton associated protein 2                                              |
| 1416802_a_at   | NM_026410                | cell division cycle associated 5                                               |
| 1424511_at     | U80932                   | aurora kinase A                                                                |
| 1452954_at     | AV162459                 | ubiquitin-conjugating enzyme E2C                                               |
| 1416664_at     | NM_023223                | cell division cycle 20 homolog (S. cerevisiae)                                 |
| 1417910_at     | X75483                   | cyclin A2                                                                      |
| 1438511_a_at   | BB408123                 | RIKEN cDNA 1190002H23 gene                                                     |
| 1417420_at     | NM_007631                | cyclin D1                                                                      |
| 1433558_at     | BM231046                 | disabled homolog 2 (Drosophila) interacting protein                            |
| 1433736_at     | BG864583                 | host cell factor C1                                                            |
| 1416532_at     | NM_133901                | transformation/transcription domain-associated protein                         |
| 1448777_at     | NM_008564                | minichromosome maintenance deficient 2 mitotin (S. cerevisiae)                 |
| 1415811_at     | BB702754                 | ubiquitin-like, containing PHD and RING finger domains, 1                      |
| 1416433_at     | BC004578                 | replication protein A2                                                         |
| 1415810_at     | BB702754                 | ubiquitin-like, containing PHD and RING finger domains, 1                      |
| 1415878_at     | BB758819                 | ribonucleotide reductase M1                                                    |
| 1416641_at     | NM_010715                | ligase I, DNA, ATP-dependent                                                   |
| 1423847_at     | BC025460                 | non-SMC condensin I complex, subunit D2                                        |
| 1416746_at     | NM_010436                | H2A histone family, member X                                                   |
| 1415945_at     | NM_008566                | minichromosome maintenance deficient 5, cell division cycle 46 (S. cerevisiae) |
| 1416575_at     | NM_009862                | cell division cycle 45 homolog (S. cerevisiae)-like                            |
| 1458560_at     | BB825704                 | asp (abnormal spindle)-like, microcephaly associated (Drosophila)              |
| 1417542_at     | BB737182                 | ribosomal protein S6 kinase, polypeptide 2                                     |
| 1452210_at     | BB546985                 | DNA2 DNA replication helicase 2-like (yeast)                                   |
| 1415680_at     | NM_008569                | anaphase promoting complex subunit 1                                           |
| 1433408_a_at   | AK010648                 | minichromosome maintenance deficient 10 (S. cerevisiae)                        |
| 1426002_a_at   | AB018574                 | cell division cycle 7 (S. cerevisiae)                                          |
| 1426100_a_at   | AF105217                 | thymidine kinase 2, mitochondrial                                              |
| 1452616_s_at   | BG073014                 | single-stranded DNA binding protein 1                                          |
| 1427885_at     | AK010477                 | polymerase (DNA-directed), delta 4                                             |
| 1435164_s_at   | AW210753                 | ubiquitin-activating enzyme E1C                                                |
| 1417239_at     | BC002162                 | centrin 3                                                                      |
| 1452725_a_at   | AK010292                 | ribonuclease H2, large subunit                                                 |
| 1424461_at     | BC004613                 | dynactin 2                                                                     |
| 1419247_at     | AF215668                 | regulator of G-protein signaling 2                                             |
| 1419248_at     | AF215668                 | regulator of G-protein signaling 2                                             |
| 1452648_at     | AK010925                 | transferrin growth factor beta regulated gene 1                                |
| 1427338_at     | BC027090                 | ciliary rootlet coiled-coil, rootletin                                         |

## Rosenfeld\_C: Zinc Finger Proteins

AMD911  
AMD970  
AMD974  
AMD907  
AMD917  
AMD914  
AMD918  
AMD051  
AMD053  
AMD1928  
AMD1919  
AMD801  
AMD803  
AMD906  
AMD903  
AMD904  
AMD002  
AMD046  
AMD048  
Bes695  
Bes695\_Con  
Ral699  
AMD680  
AMD003  
Con752  
AMD004  
AMD392  
AMD001  
AMD041  
Mpp754

ICI\_BES  
ICI\_BES  
ICI\_BES  
ICI\_BES  
BES\_LD  
BES\_LD  
BES\_LD  
MPP\_BES  
MPP\_BES  
MPP\_BES  
RAL\_BES  
RAL\_BES  
RAL\_BES  
ICI  
ICI  
ICI  
BES\_HD  
BES\_HD  
BES\_HD  
BES\_HD  
BES\_HD  
RAL  
RAL  
RAL  
CON  
CON  
CON  
CON  
MPP  
MPP

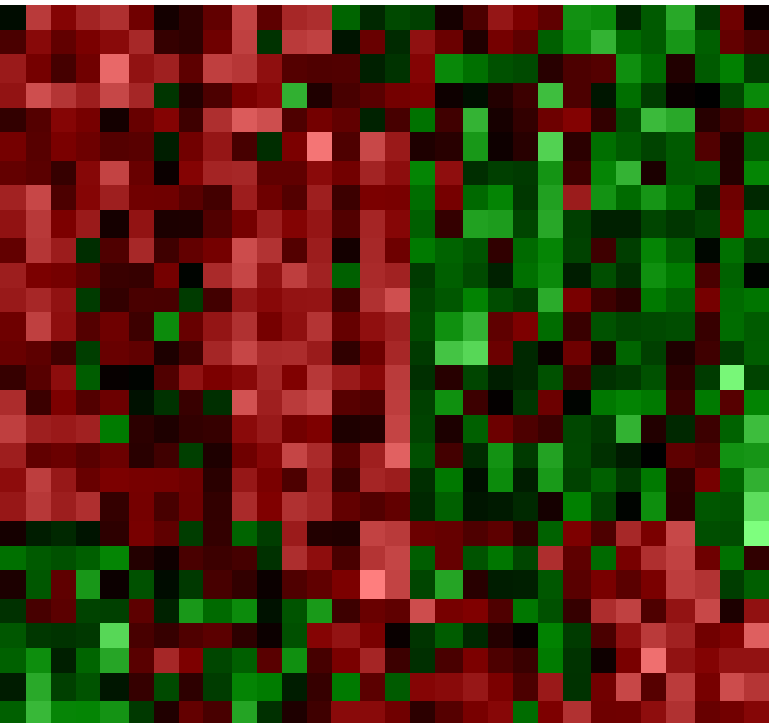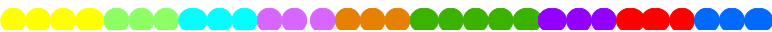

| 1 Probe Set ID | Representative Public ID | Gene Title                                              |
|----------------|--------------------------|---------------------------------------------------------|
| 14 26266_s_at  | BB4 17508                | zinc finger and BTB domain containing 8 opposite strand |
| 14 38026_at    | AV21 3597                | zinc finger protein 560                                 |
| 14 51146_at    | BC0047 47                | zinc finger protein 386 (Kruppel-like)                  |
| 14 25030_at    | BC0069 64                | zinc finger protein 622                                 |
| 14 51566_at    | BC0054 71                | zinc finger protein 810                                 |
| 14 25495_at    | BC0229 35                | zinc finger protein 62                                  |
| 14 39558_at    | BM72 9399                | zinc finger protein 75                                  |
| 14 25010_at    | AF242 376                | zinc finger protein 119                                 |
| 14 24261_at    | BC0032 58                | zinc finger protein 672                                 |
| 14 34355_at    | BB1 59201                | zinc finger protein 617                                 |
| 14 29623_at    | AV26 1187                | zinc finger protein 644                                 |
| 14 27200_at    | AJ2 50693                | zinc finger, RAN-binding domain containing 1            |
| 14 34236_at    | BB6 67600                | zinc finger, DHHC domain containing 20                  |
| 14 27969_s_at  | BC0277 60                | zinc finger protein 654                                 |
| 14 53105_at    | BG069 835                | zinc finger protein 263                                 |
| 14 28341_at    | BM23 0200                | zinc finger protein 655                                 |
| 14 34896_at    | BM23 0211                | zinc finger protein 422, related sequence 1             |
| 14 19207_at    | NM_00955 4               | zinc finger protein 37                                  |
| 14 49546_a_at  | NM_13335 8               | zinc finger protein 617                                 |
| 14 48760_at    | NM_01384 4               | zinc finger protein 68                                  |
| 14 36429_at    | BB1 98855                | zinc finger protein 606                                 |
| 14 54884_at    | BG073 185                | zinc finger and BTB domain containing 46                |
| 14 37111_at    | BB1 83628                | zinc finger CCCH type containing 12 C                   |
| 14 22528_a_at  | M5 8566                  | zinc finger protein 36, C3H type-like 1                 |
| 14 60691_at    | BF38 5956                | zinc finger protein 598                                 |
| 14 49353_at    | NM_00951 7               | zinc finger matrix type 3                               |
| 14 25819_at    | BC0181 87                | zinc finger and BTB domain containing 7C                |
| 14 26531_at    | BB8 32996                | zinc finger, MYND domain containing 11                  |

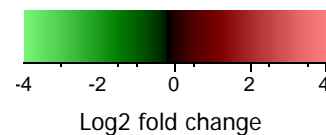

- DMSO Control
- beta-Estradiol (low dose)
- beta-Estradiol (high dose)
- ICI
- MPP
- Raloxifene
- ICI + beta-Estradiol
- MPP + beta-Estradiol
- Raloxifene + beta-Estradiol

# Rosenfeld\_C:Transcription Factors/Regulators

Supplementary Material, Figure 1m

AND01  
AND02  
AND03  
AND04  
AND05  
AND06  
AND07  
AND08  
AND09  
AND10  
AND11  
AND12  
AND13  
AND14  
AND15  
AND16  
AND17  
AND18  
AND19  
AND20  
AND21  
AND22  
AND23  
AND24  
AND25  
AND26  
AND27  
AND28  
AND29  
AND30  
AND31  
AND32  
AND33  
AND34  
AND35  
AND36  
AND37  
AND38  
AND39  
AND40  
AND41  
AND42  
AND43  
AND44  
AND45  
AND46  
AND47  
AND48  
AND49  
AND50  
AND51  
AND52  
AND53  
AND54  
AND55  
AND56  
AND57  
AND58  
AND59  
AND60  
AND61  
AND62  
AND63  
AND64  
AND65  
AND66  
AND67  
AND68  
AND69  
AND70  
AND71  
AND72  
AND73  
AND74  
AND75  
AND76  
AND77  
AND78  
AND79  
AND80  
AND81  
AND82  
AND83  
AND84  
AND85  
AND86  
AND87  
AND88  
AND89  
AND90  
AND91  
AND92  
AND93  
AND94  
AND95  
AND96  
AND97  
AND98  
AND99  
AND100  
AND101  
AND102  
AND103  
AND104  
AND105  
AND106  
AND107  
AND108  
AND109  
AND110  
AND111  
AND112  
AND113  
AND114  
AND115  
AND116  
AND117  
AND118  
AND119  
AND120  
AND121  
AND122  
AND123  
AND124  
AND125  
AND126  
AND127  
AND128  
AND129  
AND130  
AND131  
AND132  
AND133  
AND134  
AND135  
AND136  
AND137  
AND138  
AND139  
AND140  
AND141  
AND142  
AND143  
AND144  
AND145  
AND146  
AND147  
AND148  
AND149  
AND150  
AND151  
AND152  
AND153  
AND154  
AND155  
AND156  
AND157  
AND158  
AND159  
AND160  
AND161  
AND162  
AND163  
AND164  
AND165  
AND166  
AND167  
AND168  
AND169  
AND170  
AND171  
AND172  
AND173  
AND174  
AND175  
AND176  
AND177  
AND178  
AND179  
AND180  
AND181  
AND182  
AND183  
AND184  
AND185  
AND186  
AND187  
AND188  
AND189  
AND190  
AND191  
AND192  
AND193  
AND194  
AND195  
AND196  
AND197  
AND198  
AND199  
AND200  
AND201  
AND202  
AND203  
AND204  
AND205  
AND206  
AND207  
AND208  
AND209  
AND210  
AND211  
AND212  
AND213  
AND214  
AND215  
AND216  
AND217  
AND218  
AND219  
AND220  
AND221  
AND222  
AND223  
AND224  
AND225  
AND226  
AND227  
AND228  
AND229  
AND230  
AND231  
AND232  
AND233  
AND234  
AND235  
AND236  
AND237  
AND238  
AND239  
AND240  
AND241  
AND242  
AND243  
AND244  
AND245  
AND246  
AND247  
AND248  
AND249  
AND250  
AND251  
AND252  
AND253  
AND254  
AND255  
AND256  
AND257  
AND258  
AND259  
AND260  
AND261  
AND262  
AND263  
AND264  
AND265  
AND266  
AND267  
AND268  
AND269  
AND270  
AND271  
AND272  
AND273  
AND274  
AND275  
AND276  
AND277  
AND278  
AND279  
AND280  
AND281  
AND282  
AND283  
AND284  
AND285  
AND286  
AND287  
AND288  
AND289  
AND290  
AND291  
AND292  
AND293  
AND294  
AND295  
AND296  
AND297  
AND298  
AND299  
AND300  
AND301  
AND302  
AND303  
AND304  
AND305  
AND306  
AND307  
AND308  
AND309  
AND310  
AND311  
AND312  
AND313  
AND314  
AND315  
AND316  
AND317  
AND318  
AND319  
AND320  
AND321  
AND322  
AND323  
AND324  
AND325  
AND326  
AND327  
AND328  
AND329  
AND330  
AND331  
AND332  
AND333  
AND334  
AND335  
AND336  
AND337  
AND338  
AND339  
AND340  
AND341  
AND342  
AND343  
AND344  
AND345  
AND346  
AND347  
AND348  
AND349  
AND350  
AND351  
AND352  
AND353  
AND354  
AND355  
AND356  
AND357  
AND358  
AND359  
AND360  
AND361  
AND362  
AND363  
AND364  
AND365  
AND366  
AND367  
AND368  
AND369  
AND370  
AND371  
AND372  
AND373  
AND374  
AND375  
AND376  
AND377  
AND378  
AND379  
AND380  
AND381  
AND382  
AND383  
AND384  
AND385  
AND386  
AND387  
AND388  
AND389  
AND390  
AND391  
AND392  
AND393  
AND394  
AND395  
AND396  
AND397  
AND398  
AND399  
AND400  
AND401  
AND402  
AND403  
AND404  
AND405  
AND406  
AND407  
AND408  
AND409  
AND410  
AND411  
AND412  
AND413  
AND414  
AND415  
AND416  
AND417  
AND418  
AND419  
AND420  
AND421  
AND422  
AND423  
AND424  
AND425  
AND426  
AND427  
AND428  
AND429  
AND430  
AND431  
AND432  
AND433  
AND434  
AND435  
AND436  
AND437  
AND438  
AND439  
AND440  
AND441  
AND442  
AND443  
AND444  
AND445  
AND446  
AND447  
AND448  
AND449  
AND450  
AND451  
AND452  
AND453  
AND454  
AND455  
AND456  
AND457  
AND458  
AND459  
AND460  
AND461  
AND462  
AND463  
AND464  
AND465  
AND466  
AND467  
AND468  
AND469  
AND470  
AND471  
AND472  
AND473  
AND474  
AND475  
AND476  
AND477  
AND478  
AND479  
AND480  
AND481  
AND482  
AND483  
AND484  
AND485  
AND486  
AND487  
AND488  
AND489  
AND490  
AND491  
AND492  
AND493  
AND494  
AND495  
AND496  
AND497  
AND498  
AND499  
AND500  
AND501  
AND502  
AND503  
AND504  
AND505  
AND506  
AND507  
AND508  
AND509  
AND510  
AND511  
AND512  
AND513  
AND514  
AND515  
AND516  
AND517  
AND518  
AND519  
AND520  
AND521  
AND522  
AND523  
AND524  
AND525  
AND526  
AND527  
AND528  
AND529  
AND530  
AND531  
AND532  
AND533  
AND534  
AND535  
AND536  
AND537  
AND538  
AND539  
AND540  
AND541  
AND542  
AND543  
AND544  
AND545  
AND546  
AND547  
AND548  
AND549  
AND550  
AND551  
AND552  
AND553  
AND554  
AND555  
AND556  
AND557  
AND558  
AND559  
AND560  
AND561  
AND562  
AND563  
AND564  
AND565  
AND566  
AND567  
AND568  
AND569  
AND570  
AND571  
AND572  
AND573  
AND574  
AND575  
AND576  
AND577  
AND578  
AND579  
AND580  
AND581  
AND582  
AND583  
AND584  
AND585  
AND586  
AND587  
AND588  
AND589  
AND590  
AND591  
AND592  
AND593  
AND594  
AND595  
AND596  
AND597  
AND598  
AND599  
AND600  
AND601  
AND602  
AND603  
AND604  
AND605  
AND606  
AND607  
AND608  
AND609  
AND610  
AND611  
AND612  
AND613  
AND614  
AND615  
AND616  
AND617  
AND618  
AND619  
AND620  
AND621  
AND622  
AND623  
AND624  
AND625  
AND626  
AND627  
AND628  
AND629  
AND630  
AND631  
AND632  
AND633  
AND634  
AND635  
AND636  
AND637  
AND638  
AND639  
AND640  
AND641  
AND642  
AND643  
AND644  
AND645  
AND646  
AND647  
AND648  
AND649  
AND650  
AND651  
AND652  
AND653  
AND654  
AND655  
AND656  
AND657  
AND658  
AND659  
AND660  
AND661  
AND662  
AND663  
AND664  
AND665  
AND666  
AND667  
AND668  
AND669  
AND670  
AND671  
AND672  
AND673  
AND674  
AND675  
AND676  
AND677  
AND678  
AND679  
AND680  
AND681  
AND682  
AND683  
AND684  
AND685  
AND686  
AND687  
AND688  
AND689  
AND690  
AND691  
AND692  
AND693  
AND694  
AND695  
AND696  
AND697  
AND698  
AND699  
AND700  
AND701  
AND702  
AND703  
AND704  
AND705  
AND706  
AND707  
AND708  
AND709  
AND710  
AND711  
AND712  
AND713  
AND714  
AND715  
AND716  
AND717  
AND718  
AND719  
AND720  
AND721  
AND722  
AND723  
AND724  
AND725  
AND726  
AND727  
AND728  
AND729  
AND730  
AND731  
AND732  
AND733  
AND734  
AND735  
AND736  
AND737  
AND738  
AND739  
AND740  
AND741  
AND742  
AND743  
AND744  
AND745  
AND746  
AND747  
AND748  
AND749  
AND750  
AND751  
AND752  
AND753  
AND754  
AND755  
AND756  
AND757  
AND758  
AND759  
AND760  
AND761  
AND762  
AND763  
AND764  
AND765  
AND766  
AND767  
AND768  
AND769  
AND770  
AND771  
AND772  
AND773  
AND774  
AND775  
AND776  
AND777  
AND778  
AND779  
AND780  
AND781  
AND782  
AND783  
AND784  
AND785  
AND786  
AND787  
AND788  
AND789  
AND790  
AND791  
AND792  
AND793  
AND794  
AND795  
AND796  
AND797  
AND798  
AND799  
AND800  
AND801  
AND802  
AND803  
AND804  
AND805  
AND806  
AND807  
AND808  
AND809  
AND810  
AND811  
AND812  
AND813  
AND814  
AND815  
AND816  
AND817  
AND818  
AND819  
AND820  
AND821  
AND822  
AND823  
AND824  
AND825  
AND826  
AND827  
AND828  
AND829  
AND830  
AND831  
AND832  
AND833  
AND834  
AND835  
AND836  
AND837  
AND838  
AND839  
AND840  
AND841  
AND842  
AND843  
AND844  
AND845  
AND846  
AND847  
AND848  
AND849  
AND850  
AND851  
AND852  
AND853  
AND854  
AND855  
AND856  
AND857  
AND858  
AND859  
AND860  
AND861  
AND862  
AND863  
AND864  
AND865  
AND866  
AND867  
AND868  
AND869  
AND870  
AND871  
AND872  
AND873  
AND874  
AND875  
AND876  
AND877  
AND878  
AND879  
AND880  
AND881  
AND882  
AND883  
AND884  
AND885  
AND886  
AND887  
AND888  
AND889  
AND890  
AND891  
AND892  
AND893  
AND894  
AND895  
AND896  
AND897  
AND898  
AND899  
AND900  
AND901  
AND902  
AND903  
AND904  
AND905  
AND906  
AND907  
AND908  
AND909  
AND910  
AND911  
AND912  
AND913  
AND914  
AND915  
AND916  
AND917  
AND918  
AND919  
AND920  
AND921  
AND922  
AND923  
AND924  
AND925  
AND926  
AND927  
AND928  
AND929  
AND930  
AND931  
AND932  
AND933  
AND934  
AND935  
AND936  
AND937  
AND938  
AND939  
AND940  
AND941  
AND942  
AND943  
AND944  
AND945  
AND946  
AND947  
AND948  
AND949  
AND950  
AND951  
AND952  
AND953  
AND954  
AND955  
AND956  
AND957  
AND958  
AND959  
AND960  
AND961  
AND962  
AND963  
AND964  
AND965  
AND966  
AND967  
AND968  
AND969  
AND970  
AND971  
AND972  
AND973  
AND974  
AND975  
AND976  
AND977  
AND978  
AND979  
AND980  
AND981  
AND982  
AND983  
AND984  
AND985  
AND986  
AND987  
AND988  
AND989  
AND990  
AND991  
AND992  
AND993  
AND994  
AND995  
AND996  
AND997  
AND998  
AND999  
AND1000

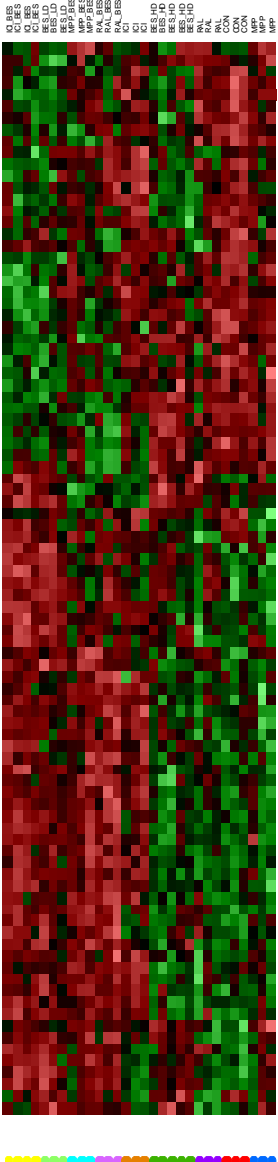

| 1 Probe Set ID | Representative Public ID | Gene Title                                                                                                                                             |
|----------------|--------------------------|--------------------------------------------------------------------------------------------------------------------------------------------------------|
| 1428657_at     | BE197381                 | as responsive element binding protein 1                                                                                                                |
| 1453288_at     | AK020270                 | activating transcription factor 6                                                                                                                      |
| 1448380_at     | NM_009452                | Kruppel-like factor 2 (lung)                                                                                                                           |
| 1434564_at     | BC176318                 | E2F1 transcription factor 3                                                                                                                            |
| 1428353_at     | BM206907                 | forkhead box K2                                                                                                                                        |
| 1426725_s_at   | BB151715                 | E2F6 avian leukemia oncogene 1, 5 domain                                                                                                               |
| 1425466_at     | AV317187                 | SUMO3/ubiquitin specific peptidase 2                                                                                                                   |
| 1424712_at     | BC023122                 | AT hook containing transcription factor 1                                                                                                              |
| 1423388_at     | BG075593                 | TAF12 RNA polymerase II, TATA box binding protein (TBP) associated factor                                                                              |
| 1439314_at     | AV230980                 | orcidan locomotor output cyclase input                                                                                                                 |
| 1454884_at     | BG073185                 | zinc finger and BTB domain containing 46                                                                                                               |
| 1431111_at     | BM209844                 | TSC22 domain family, member 1                                                                                                                          |
| 1429304_at     | BF1161506                | ankyrin repeat domain 10                                                                                                                               |
| 1440555_at     | NM_010296                | GLI-Kruppel family member GLI1                                                                                                                         |
| 1428142_at     | AK030461                 | ets variant gene 5                                                                                                                                     |
| 1450082_s_at   | BG966751                 | ets variant gene 5                                                                                                                                     |
| 1426237_at     | BC021759                 | Sq2 transcription factor                                                                                                                               |
| 1423845_at     | BC016109                 | cold shock domain containing C2, RNA binding                                                                                                           |
| 1416505_at     | NM_010444                | nuclear receptor subfamily 4, group A, member 1                                                                                                        |
| 1428979_at     | AV316320                 | metal response element binding transcription factor 1                                                                                                  |
| 1433197_at     | AK012187                 | mediator of RNA polymerase II transcription, subunit 25 homolog (yeast)                                                                                |
| 1424822_at     | BC013716                 | heat shock factor 1                                                                                                                                    |
| 1426531_at     | BB832966                 | zinc finger, MYND domain containing 11                                                                                                                 |
| 1424385_at     | BC016616                 | RKRN cDNA 583017110 gene                                                                                                                               |
| 1428186_at     | BM207455                 | E2F1 transcription factor 9                                                                                                                            |
| 1451885_at     | AY050217                 | myeloid/lymphoid or mixed lineage-leukemia translocation to 6 homolog (Drosophila)                                                                     |
| 1434633_at     | BG076163                 | CREB binding protein                                                                                                                                   |
| 1423750_a_at   | BC009091                 | Splicing factor 1                                                                                                                                      |
| 1421384_at     | NM_008716                | Naish gene homolog 3 (Drosophila)                                                                                                                      |
| 1454832_at     | AW543416                 | REST corepressor 1                                                                                                                                     |
| 1416532_at     | NM_133901                | transformation/transcription domain-associated protein                                                                                                 |
| 1415746_at     | AF368980                 | capucine homolog (Drosophila)                                                                                                                          |
| 1424130_a_at   | BC021476                 | polymerase I and transcription release factor                                                                                                          |
| 1448189_a_at   | NM_022009                | flightless I homolog (Drosophila)                                                                                                                      |
| 1434900_at     | BM196656                 | MKL (megakaryoblastic leukemia) myocardin-like 1                                                                                                       |
| 1416044_at     | NM_022009                | flightless I homolog (Drosophila)                                                                                                                      |
| 1421812_at     | AF043963                 | TAF1 binding protein                                                                                                                                   |
| 1415976_a_at   | AJ080787                 | calcium regulated heat stable protein 1                                                                                                                |
| 1424740_at     | BG070002                 | cAMP responsive element binding protein 3                                                                                                              |
| 1424694_at     | BC022741                 | RAB13, member RAS oncogene family                                                                                                                      |
| 1436499_at     | BB139855                 | zinc finger protein 616                                                                                                                                |
| 1440169_x_at   | BB522855                 | interleukin (alpha and beta) receptor 2                                                                                                                |
| 1419184_a_at   | NM_010212                | four and a half LIM domains 2                                                                                                                          |
| 1423334_at     | BB233415                 | progesterone induced domain 2                                                                                                                          |
| 1417041_at     | NM_003085                | RNA polymerase 1-1                                                                                                                                     |
| 1428933_at     | AK011332                 | histone deacetylase 8                                                                                                                                  |
| 1418174_at     | BC018523                 | Distal telomere promoter binding protein                                                                                                               |
| 1438211_s_at   | BB520183                 | Distal telomere promoter binding protein                                                                                                               |
| 1420387_at     | NM_008622                | Mpv17 transgene, Kichuji disease mutant                                                                                                                |
| 1425079_a_at   | AF109769                 | mitogen-activated protein kinase 8 interacting protein 1                                                                                               |
| 1426226_at     | BB789444                 | general transcription factor IF, polypeptide 2                                                                                                         |
| 1432000_a_at   | AK006814                 | distal helix/loop domain containing                                                                                                                    |
| 1451566_at     | BC005471                 | zinc finger protein 810                                                                                                                                |
| 1431146_at     | BC004747                 | zinc finger protein 366 (Kruppel-like)                                                                                                                 |
| 1442654_at     | AK531138                 | RKRN cDNA A530054111 gene                                                                                                                              |
| 1433105_at     | BG069835                 | zinc finger protein 263                                                                                                                                |
| 1442739_at     | BF225404                 | cDNA sequence BC031441                                                                                                                                 |
| 1419207_at     | NM_009554                | zinc finger protein 37                                                                                                                                 |
| 1428933_at     | AK011776                 | RKRN cDNA 2610041015 gene // hypothetical protein LOC10044296                                                                                          |
| 1452876_x_at   | AK011776                 | RKRN cDNA 2610041015 gene // hypothetical protein LOC10044296                                                                                          |
| 1434986_at     | BM202011                 | zinc finger protein 422, related sequence 1                                                                                                            |
| 1428341_at     | BM202200                 | zinc finger protein 655                                                                                                                                |
| 1422135_at     | NM_011980                | similar to zinc finger protein 146                                                                                                                     |
| 1427869_s_at   | BC027760                 | zinc finger protein 654                                                                                                                                |
| 1429371_at     | AK013166                 | RKRN cDNA 2610126106 gene                                                                                                                              |
| 1454633_at     | BM245140                 | RKRN cDNA 3110146119 gene                                                                                                                              |
| 1428304_at     | AK011866                 | RKRN cDNA 2610050173 gene                                                                                                                              |
| 1424784_at     | AV047635                 | predicted gene, OTTMUSG0000010657                                                                                                                      |
| 1455914_at     | AW159140                 | expressed sequence A1987944                                                                                                                            |
| 1434355_at     | BB139855                 | zinc finger protein 617                                                                                                                                |
| 1455196_s_at   | AA987127                 | expressed sequence AA987161                                                                                                                            |
| 1440546_a_at   | NM_133558                | zinc finger protein 617                                                                                                                                |
| 1446760_at     | NM_013844                | zinc finger protein 68                                                                                                                                 |
| 1437911_at     | BM245142                 | RKRN cDNA 6330416107 gene                                                                                                                              |
| 1425642_at     | BC004630                 | osteosomal protein 290                                                                                                                                 |
| 1424706_at     | BC011188                 | zinc finger protein 51 // hypothetical protein LOC100044272                                                                                            |
| 1427349_x_at   | AK021776                 | RKRN cDNA 261002102102 gene                                                                                                                            |
| 1438250_at     | BB144571                 | TAF12 RNA polymerase II, TATA box binding protein (TBP) associated factor // similar to RNA polymerase II TATA box binding protein associated factor G |
| 1425465_at     | BC022935                 | zinc finger protein 62                                                                                                                                 |
| 1438511_at     | AV234327                 | cyclin-dependent kinase 7 (homolog of Xenopus MO15 cdc-activating kinase)                                                                              |
| 1433055_x_at   | C77611                   | Predicted gene, OTTMUSG0000010173                                                                                                                      |
| 1434558_at     | BM729399                 | zinc finger protein 75                                                                                                                                 |
| 1424281_at     | BC003298                 | zinc finger protein 672                                                                                                                                |
| 1425210_at     | AF242376                 | zinc finger protein 119                                                                                                                                |
| 1453298_a_at   | AK012939                 | ankyrin repeat domain 22                                                                                                                               |
| 1438026_at     | AV213597                 | zinc finger protein 560                                                                                                                                |
| 1436569_a_at   | BM730602                 | proteasome (prosome, macropain) 26S subunit 1, non-ATPase 10                                                                                           |
| 1453057_s_at   | AJ010636                 | RNA polymerase 1-3 // similar to RNA polymerase 1-3                                                                                                    |
| 1446287_at     | NM_003087                | RNA polymerase 1-3                                                                                                                                     |
| 1425465_a_at   | BC019472                 | churchill domain containing 1                                                                                                                          |
| 1433855_at     | BB467195                 | tromodomain and WIP repeat domain containing 1                                                                                                         |
| 1436150_x_at   | AQ265839                 | heiy and enhancer of split 16 (Drosophila)                                                                                                             |

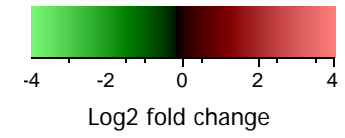

- DMSO Control
- beta-Estradiol (low dose)
- beta-Estradiol (high dose)
- ICI
- MPP
- Raloxifene
- ICI + beta-Estradiol
- MPP + beta-Estradiol
- Raloxifene + beta-Estradiol





## Rosenfeld\_C: Translation activators/Ribosomal proteins

AMD 91  
AMD970  
AMD974  
AMD907  
AMD917  
AMD914  
AMD 916  
AMD 951  
AMD053  
AMD1928  
AMD1919  
AMD001  
AMD008  
AMD006  
AMD 903  
AMD 904  
AMD002  
AMD046  
AMD048  
Bes695\_Con  
Mpp754  
AMD041  
AMD001  
C 0752  
AMD004  
AMD038  
AMD 003  
AMD 000  
Rab89

ICI\_BES  
CI\_BES  
ICI\_BES  
ICI\_BES  
BES\_LD  
BES\_LD  
BES\_LD  
MPP\_BES  
MPP\_BES  
MPP\_BES  
RAL\_BES  
RAL\_BES  
RAL\_BES  
ICI  
ICI  
CI  
BES\_HD  
BES\_HD  
BES\_HD  
BES\_HD  
MPP  
MPP  
MPP  
CON  
CON  
CON  
CON  
RAL  
RAL  
RAL

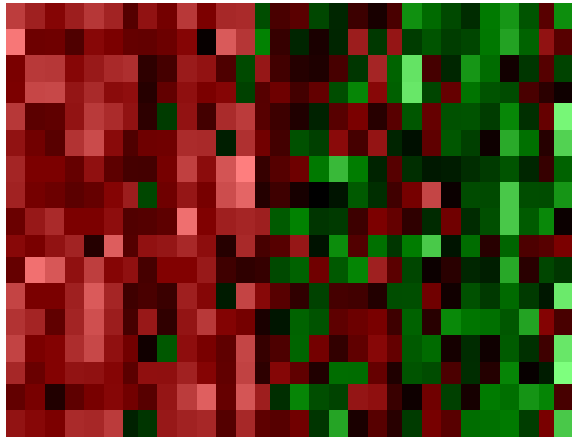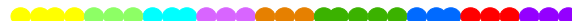

| 1 Probe Set ID | Representative Public ID | Gene Title                                                     |
|----------------|--------------------------|----------------------------------------------------------------|
| 1434452_x_at   | BG797460                 | eukaryotic translation initiation factor 2a                    |
| 1460575_at     | BB667209                 | eukaryotic translation initiation factor 2a                    |
| 1427058_at     | AK010644                 | eukaryotic translation initiation factor 4A1                   |
| 1430980_a_at   | BI656407                 | eukaryotic translation initiation factor 4A1                   |
| 1434328_at     | BI081163                 | ribosomal protein L15                                          |
| 1448264_a_at   | NM_018799                | eukaryotic translation initiation factor 3, subunit I          |
| 1451076_s_at   | BC005598                 | eukaryotic translation initiation factor 3, subunit M          |
| 1416603_at     | NM_009079                | ribosomal protein L22 /// predicted gene, EG627737 /// sin     |
| 1456617_a_at   | BM210677                 | eukaryotic translation initiation factor 2, subunit 2 (beta)   |
| 1415685_at     | NM_133767                | mitochondrial translational initiation factor 2                |
| 1421985_a_at   | A1449084                 | eukaryotic translation initiation factor 4E member 2           |
| 1438291_x_at   | AV069169                 | ribosomal protein L37 /// similar to ribosomal protein L37     |
| 1448921_a_at   | BC022587                 | mitochondrial ribosomal protein S9                             |
| 1455600_at     | BG069767                 | ribosomal protein S3                                           |
| 1451077_at     | BM114165                 | ribosomal protein L5 /// similar to ribosomal protein L5 /// s |
| 1450865_s_at   | BF167852                 | mitochondrial ribosomal protein S24                            |
| 1422859_a_at   | NM_022891                | ribosomal protein L23                                          |

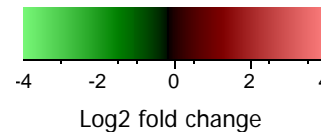

- DMSO Control
- beta-Estradiol (low dose)
- beta-Estradiol (high dose)
- ICI
- MPP
- Raloxifene
- ICI + beta-Estradiol
- MPP + beta-Estradiol
- Raloxifene + beta-Estradiol
